# Supplementary material for: Realization of fluorescence color tuning for poly(p-phenylenevinylene) coated microspheres via a heterogeneous catalytic thermal elimination process
Source: Royal Society of Chemistry journal article supplement (doi:10.1039/c4py01615g), 2014-12-09
Supplement: c4py01615g1.pdf [file c4py01615g1.pdf]

*Supporting Information for*

**Realization of Fluorescence Color Tuning for  
Poly(p-phenylenevinylene) Coated Microspheres via a  
Heterogeneous Catalytic Thermal Elimination Process**

Yun Chen, Tian Qiu, Wei Zhao and Li-Juan Fan\*

Jiangsu Key Laboratory of Advanced Functional Polymer Design and Application,  
Department of Polymer Science and Engineering, College of Chemistry, Chemical  
Engineering and Materials Science, Soochow University, Suzhou 215123, P. R. China

Correspondence to: Li-Juan Fan (E-mail: [ljfan@suda.edu.cn](mailto:ljfan@suda.edu.cn))

**1. Elimination mechanisms**

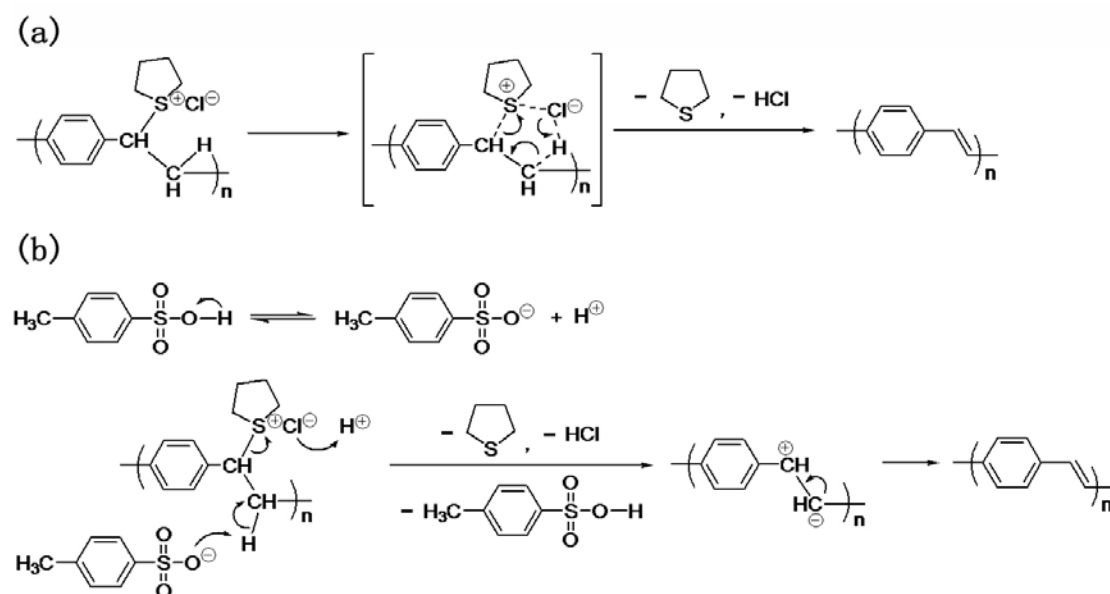

**2. Varying the elimination time in the heterogeneous catalytic thermal  
elimination process**

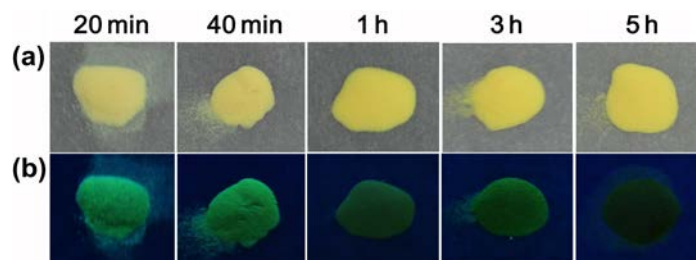

**Fig. S2** Digital photographs of SPDSVB-PPV spheres as powders, obtained at 80 °C but different elimination times, under (a) normal light; (b) a UV lamp (365nm).

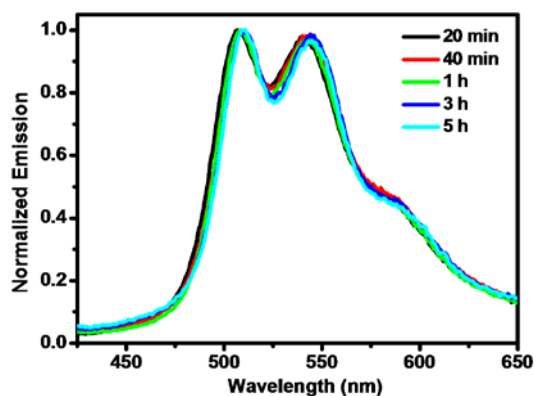

**Fig. S3** Normalized solid state fluorescence emission spectra (excited at 405nm) of the SPDSVB-PPV spheres obtained at 80°C with different times by heterogeneous catalytic elimination.

### 3. Laser scanning confocal microscopy study

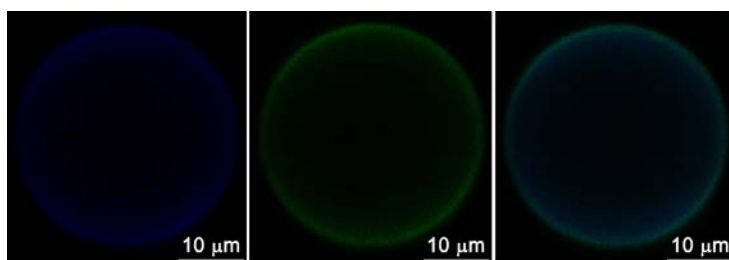

**Fig. S4** The LSCM images from optical sectioning of the SPDSVB-PPV sphere obtained at 80 °C for 1 hour (excited at 405nm). The left image was obtained by receiving the emission from the blue channel (410 nm-492 nm), the middle image was obtained by receiving the emission from the green channel (493 nm-575 nm), and the right image was obtained by directly overlapping the emissions from the blue channel and the green channel.

### 4. Stability studies

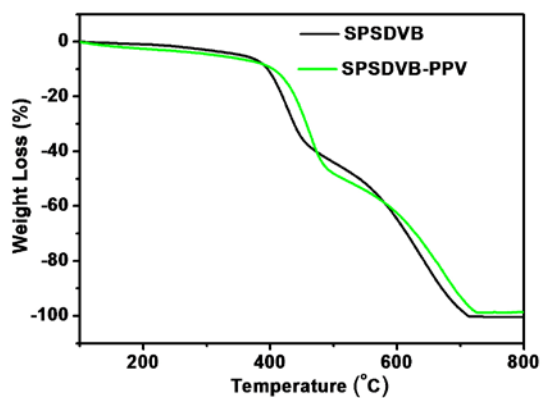

**Fig. S5** Thermogravimetric analysis of SPSDVB, and SPSDVB-PPV spheres obtained at 80 °C for 1 hour.

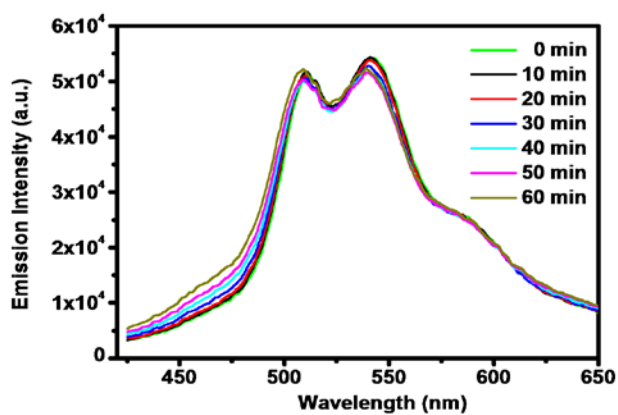

**Fig. S6** Emission spectra (excited at 405 nm) of SPSDVB-PPV spheres, obtained at 80 °C for 1 hour, after different irradiation times.
